# Supplementary material
Source: MDPI journal article supplement (https://www.mdpi.com/2076-3417/13/19/10600)
Supplement: s1 [file s1]

## Supplementary material: Online survey

### **Etude SantéGymRétro : Pratique de la gymnastique artistique féminine et santé durant la saison 2020/2021 :**

La survenue d'une blessure est un facteur limitant de la performance en Gymnastique Artistique Féminine (GAF) non négligeable du fait des conséquences sur la pratique. Mieux connaître les blessures et identifier les facteurs de risque corrigeables permettrait de mettre en place des stratégies visant à réduire le risque de survenue des blessures et/ou leurs conséquences sur la pratique.

L'objectif de cette étude est d'évaluer la prévalence et l'incidence des blessures rencontrées sur une saison sportive en gymnastique artistique, ainsi que d'identifier d'éventuels facteurs de risque ou protecteurs de ces pathologies.

La participation à cette étude consiste uniquement à répondre au questionnaire ci-dessous. Il n'y a pas de risque à y participer et les bénéfices escomptés sont une meilleure compréhension des blessures afin d'améliorer les démarches de prévention. Les données seront anonymisées une fois la base de données créée. Seules l'investigatrice principale (Sérèna CHARPY) aura accès aux données et ces données seront utilisées dans un objectif de recherche scientifique et clinique uniquement. Les questions suivantes s'adressent à toutes les gymnastes GAF licenciées et s'entraînant au sein d'un Pôle France, d'un Pôle Espoir ou d'un club membre du TOP 12 lors de la saison 2020/2021 (de septembre 2020 à août 2021).

Nous vous remercions par avance de prendre 10 à 15 minutes pour y répondre. Si tu es mineure, nous te laissons le soin d'informer tes parents. Pour toute question, n'hésitez pas à contacter : [serena.charpy@laposte.net](mailto:serena.charpy@laposte.net) (investigatrice principale)

#### **Critères d'inclusion :**

1. Pratiquez-vous de la gymnastique artistique féminine en compétition (GAF) lors de la saison 2020/2021 ?
2. Vous entraînerez-vous plus de 10 heures par semaine au sein d'un Pôle France, d'un pôle espoir ou d'un club TOP 12 lors de la saison 2020/2021 ?

#### **Vos caractéristiques au début de la saison 2020/2021 :**

Nous cherchons à mettre en évidence un lien entre les blessures et la performance. C'est pour cette raison que le questionnaire n'est pas anonyme. Votre nom ne sera visible que par l'investigatrice principale au moment de créer la base de données avec les données issues de ce

questionnaire et celles de performance. La base de données complète sera ensuite anonymisée. Seule l'équipe de recherche autour du projet aura accès à cette base de données anonyme.

1. Nom
2. Prénom
3. Quel âge aviez-vous en début de saison 2020/2021 ?
4. Etiez-vous réglée ? oui non
5. Si oui à quel âge ?
6. Etiez-vous atteinte d'une maladie chronique ? Oui Non
7. Si oui, précisez :
8. Aviez-vous eu des blessures durant les saisons précédentes (avant 2020/2021) ? (Pour cette étude, une blessure est définie par toute gêne ou douleur physique impactant l'entraînement (arrêt total ou réduction de la pratique) pendant sept jours ou plus) Oui Non
9. Quel est votre côté dominant en gymnastique (pied d'impulsion, sens de rotation en vrille, pied avant en fente) ? Droite Gauche
10. Depuis combien d'année(s) pratiquez-vous la gymnastique ?
11. Combien d'heures d'entraînement de gymnastique en moyenne pratiquez-vous par semaine avant la saison 2020/2021 ?
12. Quel était votre niveau de performance avant la saison 2020/2021 ?  
Départemental/Régional/National/International

**Votre vie durant la saison 2020/2021 :**

13. En quelle classe (niveau scolaire) étiez-vous lors de la saison 2020/2021 ?
14. Bénéficiez-vous d'aménagement de votre emploi du temps ? Oui ou non
15. Combien d'heures passiez-vous en moyenne quotidiennement en cours à l'école lors de la saison 2020/2021 ?
16. Combien de temps passez-vous quotidiennement en moyenne dans les transports (voiture, bus, car, tram, train...) ?
17. Combien de temps par jour en moyenne êtes-vous en position assise ou couchée hors sommeil (ne compter les temps consécutifs de plus de 30 minutes) ?
18. Où viviez-vous ?
  - Chez vos parents ou chez un membre de votre famille
  - En famille d'accueil
  - Internat
  - Dans votre propre domicile

- - Autre (précisez)

19. Combien d'heures dormiez-vous par nuit en moyenne lors de la saison 2020/2021?

- 0 heure
- 1 heure
- 2 heures
- 3 heures
- 4 heures
- 5 heures
- 6 heures
- 7 heures
- 8 heures
- 9 heures
- 10 heures
- 11 heures
- 12 heures
- 13 heures
- 14 heures

20. Concernant la qualité de votre sommeil (difficultés d'endormissement, réveils nocturnes, cauchemars...) ?

- Présentiez-vous des difficultés d'endormissement ? Jamais Parfois Souvent Toujours
- Présentiez-vous des réveils nocturnes ? Jamais Parfois Souvent Toujours
- Faisiez-vous des cauchemars ? Jamais Parfois Souvent Toujours
- Etiez-vous fatiguée lorsque vous vous réveillez le matin ? Jamais Parfois Souvent Toujours

**Votre pratique de la gymnastique durant la saison 2020/2021 :**

21. Combien d'heures d'entraînement de gymnastique par semaine en moyenne aviez-vous fait durant la saison 2020/2021 ?

22. Effectuiez-vous une activation cardio en début d'entraînement (course, circuit training...) ?

Non

<15 min

15-30 min

31-45 min

46 min-1 h

>1h

23. Effectuiez-vous un échauffement ou une préparation articulaire en début d'entraînement ?

Non

<15 min

15-30 min

31-45 min

46 min-1 h

>1h

24. Effectuiez-vous des séances d'étirement au cours de vos entraînements ?

Non

<15 min

15-30 min

31-45 min

46 min-1 h

>1h

25. Si oui, à quelle(s) période(s) de l'entraînement ?

- Début d'entraînement
- Milieu d'entraînement
- Fin d'entraînement

26. Au cours de vos entraînements, faisiez-vous de la préparation physique ou de la musculation ?

Non

<15 min

15-30 min

31-45 min

46 min-1 h

>1h

27. Faisiez-vous des séances de chorégraphies/danse lors de vos entraînements ?

Non

<15 min

15-30 min

31-45 min

46 min-1 h

>1h

28. Avez-vous participé à des compétitions lors de la saison 2020/2021 ?

29. Si oui, combien ?

30. Quel a été votre niveau de performance durant la saison 2020/2021 ?

Départemental/Régional/National/International

**Votre état de santé durant la saison 2020/2021 :**

Pour cette étude, une blessure est définie par toute gêne ou douleur physique impactant l'entraînement (arrêt total ou réduction de la pratique) pendant sept jours ou plus.

31. Avez-vous été blessée cette saison ? Oui Non

32. Blessure 1 à 5 : Quelle était la localisation de cette blessure ?

- Tête
- Rachis cervical
- Rachis dorsal
- Rachis Lombar
- Thorax
- Épaule
- Bras
- Coude
- Avant-bras
- Poignet
- Doigt
- Bassin
- Hanche
- Quadriceps
- Ischio-jambiers
- Adducteurs
- Genou
- Mollets
- Tibias
- Cheville
- Pied
- Orteil
- Autre

33. Quel a été le diagnostic établi pour cette blessure ? (Écrivez le diagnostic si celui-ci est

connu)

34. De quel côté était cette blessure ? Droite Gauche
35. A quel agrès est survenu cette blessure ? Saut Barres asymétriques Poutre Sol Autre
36. Cette blessure a-t-elle eu une installation brutale ou progressive ? Brutale ou Progressive
37. Un traitement a-t-il été nécessaire pour cette blessure ? Chirurgie, Kinésithérapie, Antalgiques Autre
38. Combien de temps cette blessure a-t-elle impacté votre pratique (douleur, arrêt ou restriction d'entraînement, gêne lors de l'entraînement, impossibilité de marcher...) ?
39. Avez-vous présenté une autre blessure ?
  - Si oui retour à la question 32
  - Si non question 39
40. Nous souhaitons plus de détails sur les blessures rencontrées. Avez-vous présenté au cours de l'année 2020-2021 l'une de ces pathologies ?
  - Entorse de cheville
  - Ostéochondrite du coude (pathologie dite de croissance)
  - Maladie de Osgood Schlatter (pathologie dite de croissance avec douleur à l'avant du genou)
  - Maladie de Sever (pathologie dite de croissance avec douleur au talon)
  - Rupture du ligament croisé antérieur
  - Fracture de fatigue. Si oui précisez la localisation
  - Spondylolisthésis et/ou lyse isthmique
  - Périostite tibiale
  - Tendinopathie des ischio-jambiers
  - Syndrome rotulien
  - Tendinopathie achilléenne ou patellaire
41. Suiviez-vous un programme de prévention des blessures en parallèle de vos entraînements (exercices spécifiques, renforcement, proprioception, travail avec les kinésithérapeutes...) ? Oui/Non
42. Si non, seriez -vous intéressées par l'intégration d'un tel programme à votre entraînement ?
  - 0 Pas intéressée
  - 1
  - 2
  - 3

- 4
  - 5
  - 6
  - 7
  - 8
  - 9
  - 10 Très intéressée
43. Avez-vous été malade durant cette saison 2020/2021 ?
- Infection respiratoire : Non Une fois Plusieurs fois
  - Maladies gastro-intestinales : Non Une fois Plusieurs fois
  - Migraines : Non Une fois Plusieurs fois
  - Autres : Non Une fois Plusieurs fois
44. Si oui, est-ce que cela vous a empêché de vous entraîner ?
45. Concernant la santé mentale, ressentez-vous l'un de ses signes :
- Stress : Jamais Parfois Souvent Toujours
  - Anxiété : Jamais Parfois Souvent Toujours
  - Tristesse : Jamais Parfois Souvent Toujours
  - Frustration : Jamais Parfois Souvent Toujours
  - Dégoût : Jamais Parfois Souvent Toujours
  - Baisse de moral : Jamais Parfois Souvent Toujours
  - Appréhension de l'entraînement : Jamais Parfois Souvent Toujours
  - Perte de plaisir à l'entraînement : Jamais Parfois Souvent Toujours
  - Troubles du comportement alimentaire : Jamais Parfois Souvent Toujours
  - Irritabilité : Jamais Parfois Souvent Toujours
  - Sensation d'infériorité : Jamais Parfois Souvent Toujours
  - Se sentir vide : Jamais Parfois Souvent Toujours
  - Autre : Précisez : Jamais Parfois Souvent Toujours
46. Avez-vous été atteinte du COVID ?
47. Si oui, quand ?
48. Etes-vous vaccinée contre le COVID ?
49. Si oui quand ?
50. Aviez-vous interrompu votre pratique gymnique du fait de la crise sanitaire lors de la saison 2020/2021 ? Oui Non
51. Si oui, de quelle(s) manière(s) ? Précisez (Exemple : confinement, gymnase fermé...)

52. Vos règles étaient-elles régulières ?
- Non réglée
  - Réglée avec cycles réguliers
  - Réglée avec cycles irréguliers
  - Réglée avec interruption de cycle pendant plus de 3 mois
53. Avez-vous eu une interruption de votre cycle sur une période supérieure à trois mois ?
- Oui Non Non réglée
54. Avez-vous eu une interruption de vos cycles pendant plus de 3 mois ?
55. Concernant l'alimentation, en moyenne, combien de fois par semaine preniez-vous :
- Un petit-déjeuner : 0 1 2 3 4 5 6 7
  - Une collation : 0 1 2 3 4 5 6 7
  - Un déjeuner : 0 1 2 3 4 5 6 7
  - Un goûter : 0 1 2 3 4 5 6 7
  - Un dîner : 0 1 2 3 4 5 6 7
56. Suiviez-vous un régime particulier ?
- Sans gluten
  - Sans lactose
  - Vegan
  - Végétarien
  - Autre
57. Etiez-vous supplémentée en vitamine D ?
- Oui
  - Non, pas de supplémentation vitaminique
  - Non, pas de supplémentation en vitamine D mais autre supplémentation
58. Grignotiez-vous entre les repas ? Jamais Parfois Souvent Toujours
59. Etiez-vous inquiète concernant votre poids ?
- Oui, j'ai peur de prendre du poids
  - Oui j'ai peur de perdre du poids
  - Non
60. Vous avait-on demandé de modifier votre poids ?
- Oui, de prendre du poids
  - Oui, de perdre du poids
  - Non
